# Supplementary material
Source: PubMed Central journal article supplement (PMC4339123)
Supplement: embj0034-0379-sd10.pdf [file embj0034-0379-sd10.pdf]

**Table S1 Tryptic peptides of *ApCatSper* 1-4,  $\beta$ ,  $\delta$  and  $\gamma$  identified by mass spectrometry.**

| Protein                   | Peptide sequence                 | XCorr | Probability              | Sequence coverage [%] |
|---------------------------|----------------------------------|-------|--------------------------|-----------------------|
| <i>ApCatSper</i> 1        | HLQGTGPVGAQDAALQKK               | 5.31  | 51.8                     | 10.1                  |
|                           | RQTLVGPQDIILPSHLK                | 4.0   | 35.8                     |                       |
|                           | QTLVGPQDIILPSHLK                 | 3.1   | 43.9                     |                       |
|                           | LLAAIEQNAHIMR                    | 3.89  | 104.9                    |                       |
|                           | LLAAIEQNAHIM(ox)R                | 3.35  | 60.3                     |                       |
| <i>ApCatSper</i> 2        | KSDDWEEKVVHDNLQMLVNSPSETVWPR     | 5.46  | 116.0                    | 24.8                  |
|                           | SDDWEKVVHDNLQMLVNSPSETVWPR       | 4.35  | 85.4                     |                       |
|                           | VVHDNLQMLVNSPSETVWPR             | 5.22  | 106.9                    |                       |
|                           | YFQLMEALQENLQER                  | 5.12  | 127.1                    |                       |
|                           | IIEDFHLESFDDHGHSDAPK             | 5.09  | 99.1                     |                       |
|                           | NGLEDPKMTSGIFDELAPLAEIFR         | 4.43  | 58.4                     |                       |
|                           | MTSGIFDELAPLAEIFR                | 4.11  | 115.1                    |                       |
|                           | VDLTYQDSFR                       | 3.27  | 40.2                     |                       |
|                           | HGSSLTGLDGVK                     | 3.18  | 89.5                     |                       |
|                           | QDLQNLTYHALLNIFDS                | 3.13  | 53.9                     |                       |
|                           | KTVGSSDALFR                      | 3.07  | 28.4                     |                       |
| <i>ApCatSper</i> 3        | WIRPDFEFHR                       | 3.64  | 33.0                     | 5.3                   |
|                           | MSSESLPSLTR                      | 2.99  | 28.3                     |                       |
| <i>ApCatSper</i> 4        | KGDILSNLLELEQR                   | 4.92  | 129.7                    | 16.4                  |
|                           | TDMTTQKPLHFGDFK                  | 3.98  | 106.3                    |                       |
|                           | FQNYVLLSALEDNLAHEYQTIK           | 3.28  | 8.7                      |                       |
|                           | RNSSLSPSAQALIK                   | 3.05  | 52.1                     |                       |
|                           | NSSLSPSAQALIK                    | 2.77  | 31.6                     |                       |
|                           | LFTFDPSAVQR                      | 2.91  | 30.1                     |                       |
|                           | QVENAGAAFRK                      | 2.57  | 45.2                     |                       |
|                           | EVPITSVDDVMAK                    | 2.54  | 51.2                     |                       |
| Predicted protein         | Peptide sequence                 | XCorr | PEP ( $\times 10^{-5}$ ) | Sequence coverage [%] |
| <i>ApCatSper</i> $\beta$  | TFTFGADSWNVDLGHWK                | 3.99  | 53.03                    | 11.4                  |
|                           | EVVSIVDPHREPIQLR                 | 3.19  | 52.15                    |                       |
|                           | FLILSSKEDR                       | 2.45  | 595.8                    |                       |
|                           | NTYTENVYPHLVIR                   | 4.92  | 0.36                     |                       |
|                           | LHFVYDPLVT AEEFLHGSPK            | 4.91  | 0.054                    |                       |
|                           | RLHFVYDPLVT AEEFLHGSPK           | 4.74  | 0.26                     |                       |
|                           | SIQESSHPVDSAIT VEHIAATR          | 4.66  | 0.60                     |                       |
|                           | VAMATSQEASLHANMK                 | 3.95  | 2.06                     |                       |
| <i>ApCatSper</i> $\delta$ | WSASLFPEDIGQTALR                 | 3.42  | 0.026                    | 12.9                  |
|                           | FAEFVWVWGR                       | 1.80  | 1,286.0                  |                       |
|                           | DGADYLA ADEFIQELIPGISGDFAFVTTQGR | 2.88  | 1,269.0                  |                       |
|                           | TSLLTGA AVGHLSR                  | 3.69  | 0.037                    |                       |
|                           | TPQSWVEMLGR                      | 2.97  | 3.98                     |                       |
|                           | LPYQVMNAGSNNR                    | 2.03  | 55.93                    |                       |
|                           | ILQFPH                           | 1.49  | 20,590.0                 |                       |
| <i>ApCatSper</i> $\gamma$ | LRPSEGWDHMMR                     | 3.49  | 2.41                     | 9.1                   |
|                           | KLRPSEGWDHMMR                    | 2.81  | 2,830.0                  |                       |
|                           | EGLDHRPIGESTTSTYIER              | 3.05  | 63.45                    |                       |
|                           | DPHGDP SWYDISLHSR                | 3.02  | 140                      |                       |
|                           | SLMAYQAIVHLLLER                  | 2.77  | 31.42                    |                       |
|                           | YNRQDMFGAR                       | 2.47  | 951.2                    |                       |
|                           | AIHFETPGK                        | 2.37  | 1,073.0                  |                       |
|                           | ISNLHHR                          | 2.38  | 2,636.0                  |                       |
|                           | EKYSLAAPQLTDGSLGHSEK             | 1.75  | 2,525.0                  |                       |

XCorr, cross-correlation value; Probabilities and PEP (Posterior Error Probability) values were derived by mass spectrometric analysis of tryptic peptides by the Proteome Discoverer (PD) software version 1.2 and 1.4, respectively.
