# Supplementary material
Source: PubMed Central journal article supplement (PMC4339123)
Supplement: embj0034-0379-sd11.pdf [file embj0034-0379-sd11.pdf]

**Table S2 Tryptic peptides of *Ap*CatSper 1-4,  $\beta$ ,  $\delta$ , and  $\gamma$  identified by mass spectrometry in immunoprecipitates obtained with anti-*Ap*CatSper 2 and 3 antibodies.**

| Protein                    | Peptide sequence          | anti- <i>Ap</i> CatSper 2 |                          | anti- <i>Ap</i> CatSper 3 |                          |
|----------------------------|---------------------------|---------------------------|--------------------------|---------------------------|--------------------------|
|                            |                           | XCorr                     | PEP ( $\times 10^{-5}$ ) | XCorr                     | PEP ( $\times 10^{-5}$ ) |
| <i>Ap</i> CatSper 1        | HLQGTGPVGAQDAALQK         | 4.67                      | 2.8                      | 4.77                      | 3.3                      |
|                            | RQTLVGPQDILPSHLK          | 3.32                      | 264.3                    | 3.51                      | 1,580.0                  |
|                            | QTLVGPQDILPSHLK           | 2.78                      | 1,814.0                  |                           |                          |
|                            | TLLDDYYDEDEYTR            | 4.25                      | 38.8                     | 4.25                      | 5.1                      |
|                            | LLAAIEQNAHIM(ox)R         | 3.05                      | 338.0                    | 2.88                      | 86.8                     |
|                            | EEDEEEEEELQAR             | 3.40                      | 23.5                     | 3.77                      | 8,256.0                  |
|                            | AAEDALFDDGHTKPIDTK        | 3.40                      | 1,374.0                  | 2.66                      | 339.8                    |
|                            | GNSANYLLSLSYHR            | 3.22                      | 3,423.0                  |                           |                          |
| <i>Ap</i> CatSper 2        | VVHDNLQMLVNSPSETVWPR      | 4.91                      | 3.8                      |                           |                          |
|                            | VVHDNLQM(ox)LVNSPSETVWPR  | 3.65                      | 2,890.0                  |                           |                          |
|                            | YFQLMEALQENLQER           | 4.88                      | 3.0                      |                           |                          |
|                            | YFQLM(ox)EALQENLQER       | 4.54                      | 3.2                      |                           |                          |
|                            | MTSGIFDELAPLAEIFR         | 3.02                      | 1,105.0                  |                           |                          |
|                            | M(ox)TSGIFDELAPLAEIFR     | 4.70                      | 3.0                      |                           |                          |
|                            | VDLTYQDSFR                | 3.39                      | 1,801.0                  | 2.36                      | 5,457.0                  |
|                            | HGSSLTGLDGVK              | 3.38                      | 1,900.0                  | 2.69                      | 7,826.0                  |
|                            | TVGSSDALFR                | 2.33                      | 1,575.0                  | 1.64                      | 14,310.0                 |
|                            | MM(ox)LDNPHGLVK           | 2.50                      | 4,635.0                  |                           |                          |
|                            | M(ox)M(ox)LDNPHGLVK       | 2.95                      | 1,125.0                  | 3.04                      | 6,046.0                  |
|                            | FNEELER                   | 2.64                      | 5,156.0                  | 1.98                      | 21,570.0                 |
| NELFLEVK                   | 2.61                      | 8,295.0                   |                          |                           |                          |
| <i>Ap</i> CatSper 3        | WIRPDFEFHR                | 3.74                      | 475.2                    |                           |                          |
|                            | M(ox)SSESLPLSTR           | 2.63                      | 6,853.0                  | 2.55                      | 3,115.0                  |
|                            | LQQLHFEMVNLAM(ox)ALEK     | 4.59                      | 35.5                     | 3.49                      | 144.8                    |
|                            | LQQLHFEM(ox)VNLAM(ox)ALEK | 3.68                      | 5.8                      | 4.71                      | 1.8                      |
|                            | QSDVIIDDEGEM(ox)KR        | 3.09                      | 2,090.0                  | 2.67                      | 27,260.0                 |
| <i>Ap</i> CatSper 4        | KGDILSNLLELEQR            | 4.07                      | 19,170.0                 | 4.01                      | 290.5                    |
|                            | LFTFDPSAVQR               | 2.80                      | 12,710.0                 | 2.80                      | 2,293.0                  |
|                            | GITAEIEGFHDITK            | 4.04                      | 191.5                    |                           |                          |
|                            | LVDSIWR                   | 3.17                      | 3,740.0                  | 2.61                      | 7,816.0                  |
|                            | EVPIITSVDDVM(ox)AK        | 2.83                      | 12,690.0                 | 3.35                      | 699.4                    |
| NSSLSPSAQALIK              |                           |                           | 2.42                     | 11,070.0                  |                          |
| Predicted Protein          | Peptide sequence          | anti- <i>Ap</i> CatSper 2 |                          | anti- <i>Ap</i> CatSper 3 |                          |
|                            |                           | XCorr                     | PEP ( $\times 10^{-5}$ ) | XCorr                     | PEP ( $\times 10^{-5}$ ) |
| <i>Ap</i> CatSper $\beta$  | EVVSIQVPHR                |                           |                          | 2.95                      | 60,520.0                 |
|                            | EVVSIQVPHREPIQILR         | 2.74                      | 586.0                    | 2.74                      | 66,930.0                 |
|                            | TFTFGADSWNVDLGHWK         | 2.71                      | 968.8                    | 1.63                      | 70,060.0                 |
|                            | YDVGYYR                   | 2.21                      | 73,780.0                 |                           |                          |
|                            | ELLSFSVTNPSLLDVQVAR       | 4.78                      | 70.7                     |                           |                          |
|                            | NTYTENVYPHLVIR            | 4.31                      | 317.9                    | 3.94                      | 1,775.0                  |
|                            | NIYNADPSQPR               | 3.60                      | 545.5                    | 3.25                      | 5,952.0                  |
|                            | LHFVYDPLVTAEFLHGSPK       | 3.24                      | 1,614.0                  | 4.07                      | 1,139.0                  |
|                            | RLHFVYDPLVTAEFLHGSPK      |                           |                          | 4.05                      | 4,164.0                  |
|                            | LNDHYDASK                 | 2.74                      | 8,540.0                  |                           |                          |
|                            | LGISPLTK                  | 2.44                      | 3,679.0                  | 2.47                      | 63,560.0                 |
|                            | FLILSSK                   | 1.51                      | 17,270.0                 |                           |                          |
| SIQESSHPVDSAITVEHIAATR     |                           |                           | 4.81                     | 5,635.0                   |                          |
| <i>Ap</i> CatSper $\delta$ | TSLLTGAAVGHGLSR           | 3.56                      |                          | 3.78                      | 48,510.0                 |
|                            | LPYQVM(ox)NAGSNRR         | 3.25                      | 11,320.0                 | 2.63                      | 58,220.0                 |
|                            | LPYQVMNAGSNRR             | 1.95                      | 4,419.0                  | 2.69                      | 463.9                    |
|                            | TPQSWVEMLGR               | 2.23                      | 13,200.0                 | 2.63                      | 61,980.0                 |
|                            | ILQFPH                    |                           | 5,770.0                  | 1.89                      | 25,020.0                 |
|                            | WSASLFPEDIGQTALR          |                           |                          | 1.94                      | 28,690.0                 |
|                            | HTETTFSSLPLITLQEK         |                           |                          | 2.91                      | 10,520.0                 |
| <i>Ap</i> CatSper $\gamma$ | LDVVQSVFPYVVEPIVNNR       | 4.65                      | 42,510.0                 | 4.41                      | 234.0                    |
|                            | ENELAADTHDPFLQWHR         | 3.70                      | 50,630.0                 |                           |                          |
|                            | EGLDHRPIGESTTSTYIER       | 3.64                      | 275.6                    | 3.65                      | 1,399.0                  |
|                            | SVSGSILHSSLSK             | 3.06                      | 6,942.0                  | 3.52                      | 1,805.0                  |
|                            | YSLAAPQLTDGSLGHSEK        | 2.93                      | 61,740.0                 |                           |                          |
|                            | SSALMSAGSYPK              |                           |                          | 3.36                      | 2,058.0                  |
|                            | SSALM(ox)SAGSYPK          | 2.86                      | 578.6                    | 2.84                      | 248.9                    |
|                            | FIAFDGYSR                 | 2.55                      | 1,827.0                  | 1.97                      | 5,283.0                  |
|                            | ISNLHHR                   | 2.51                      | 72,890.0                 |                           |                          |
|                            | DTTFVLLTR                 | 2.43                      | 6,191.0                  | 2.25                      | 7,796.0                  |
|                            | AIHFETPGK                 | 1.77                      | 73,980.0                 |                           |                          |
|                            | VQTTGIGTLDTAWK            | 3.29                      | 939.7                    |                           |                          |

XCorr, cross-correlation value; PEP (Posterior Error Probability) values were derived by mass spectrometric analysis of tryptic peptides by the Proteome Discoverer (PD) software version 1.4.
