# Supplementary material
Source: PubMed Central journal article supplement (PMC4339123)

## Supplementary Figure 2 of Seifert et al.

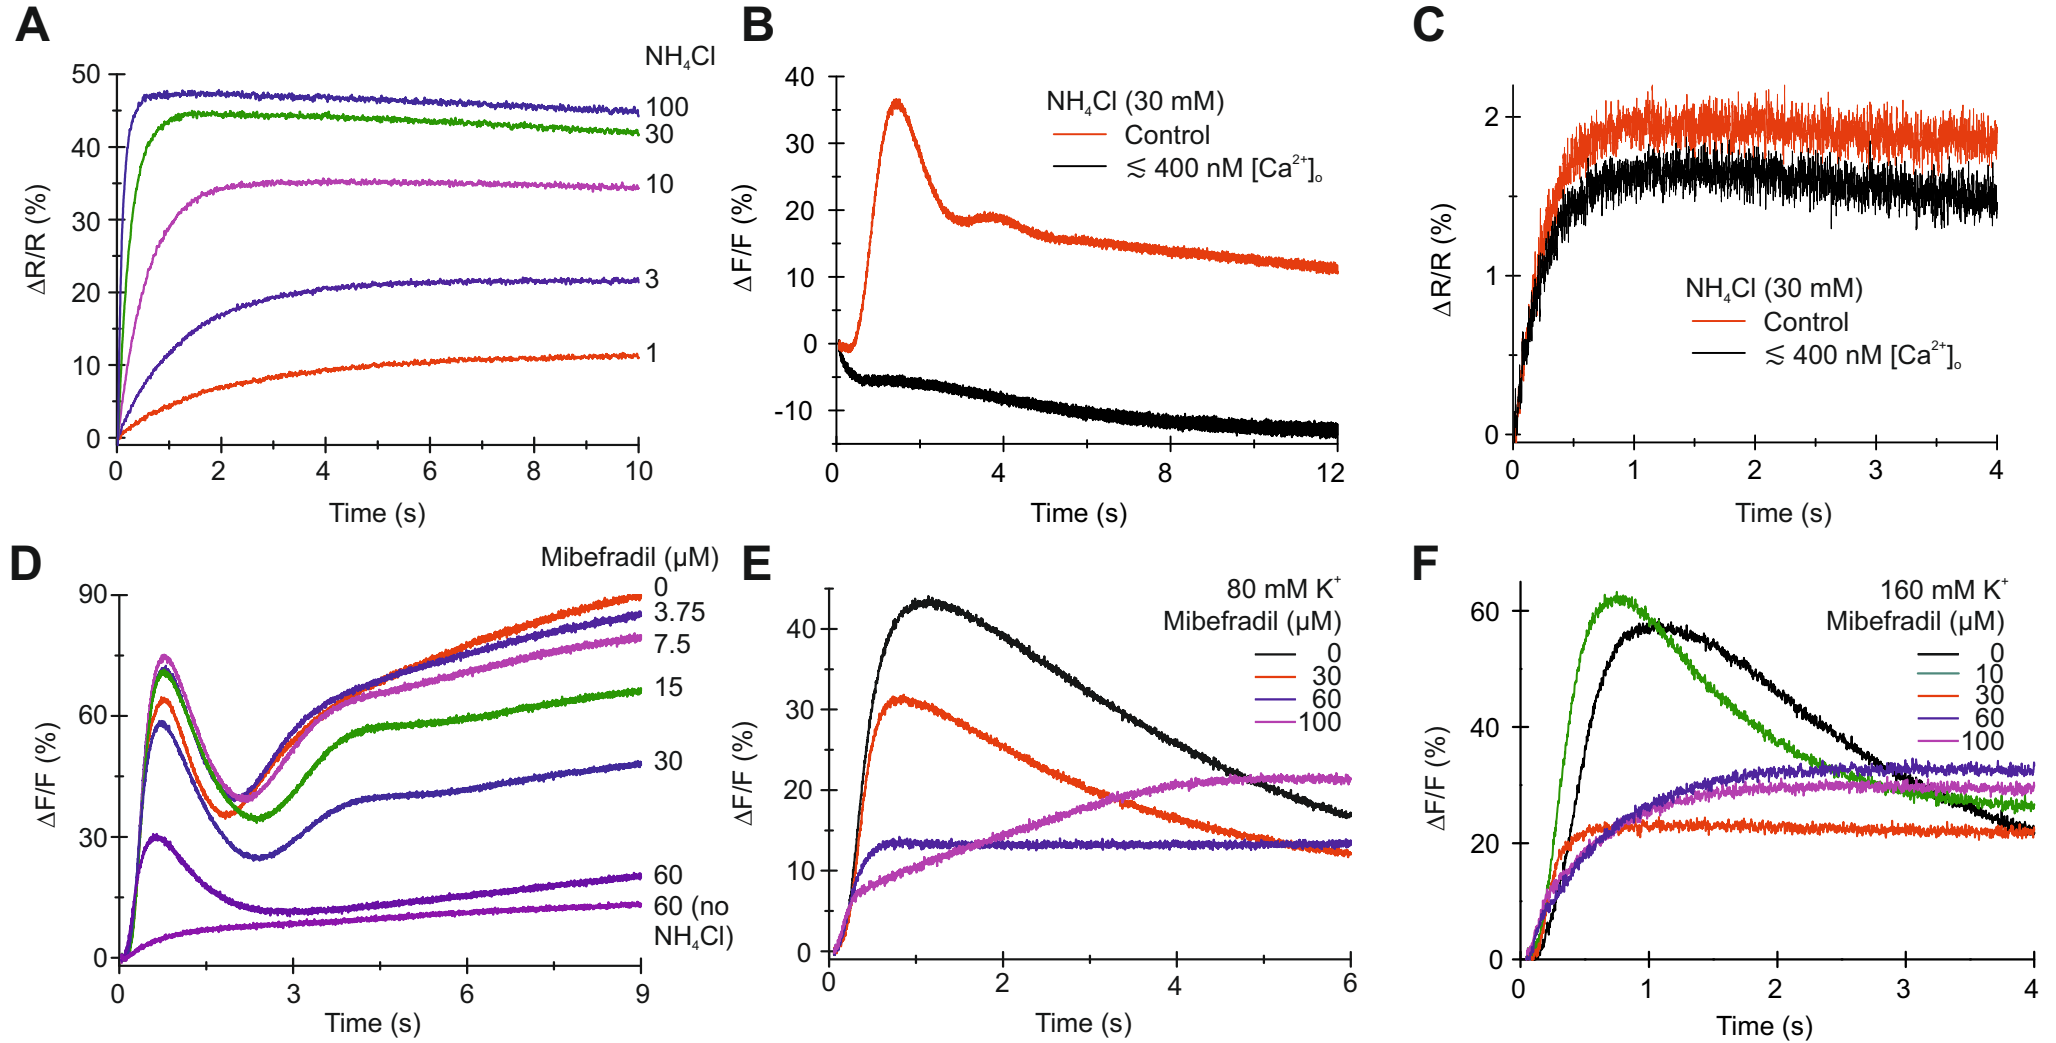

Supplement: embj0034-0379-sd2.pdf [file embj0034-0379-sd2.pdf]

# Supplementary Figure 3 of Seifert et al.

**A**

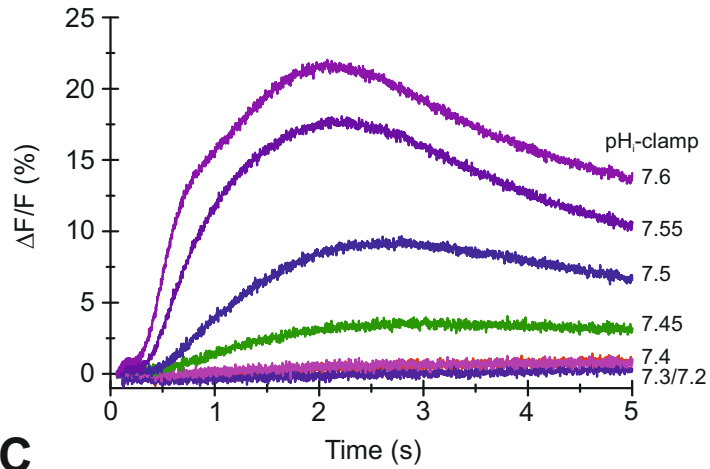

**B**

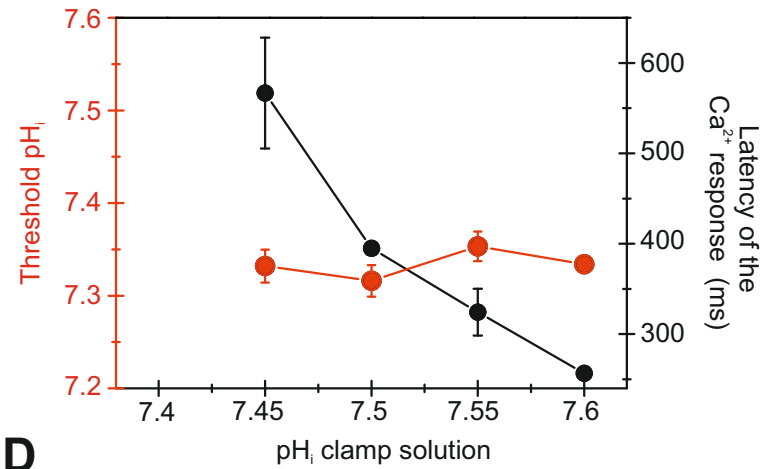

**C**

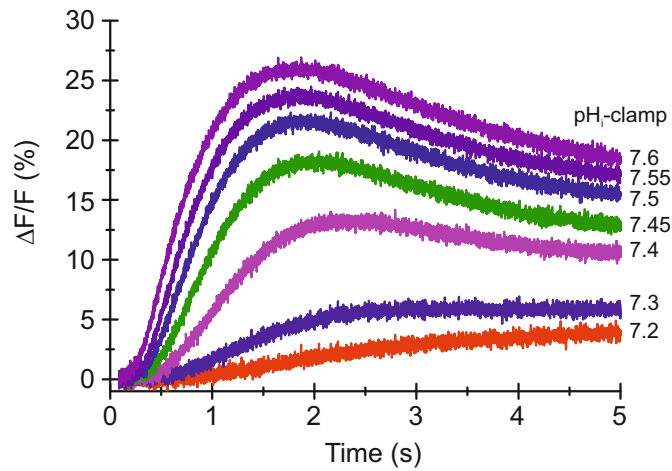

**D**

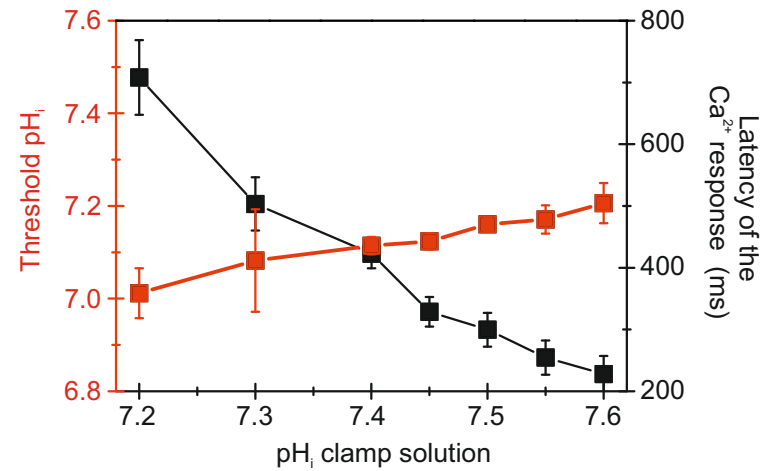

Supplement: embj0034-0379-sd3.pdf [file embj0034-0379-sd3.pdf]

## Supplementary Figure 4 of Seifert et al.

**A**

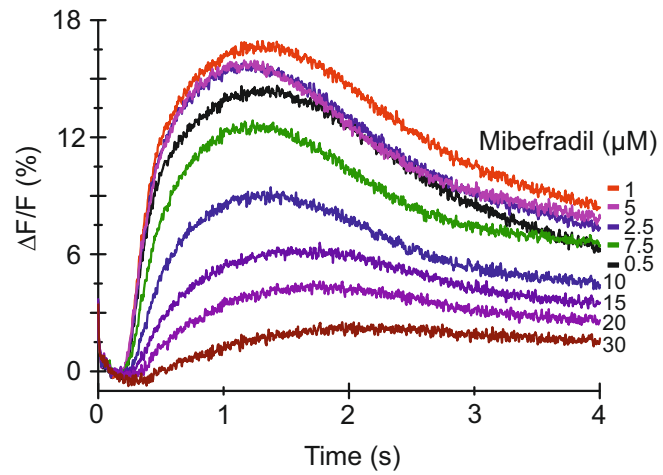

**B**

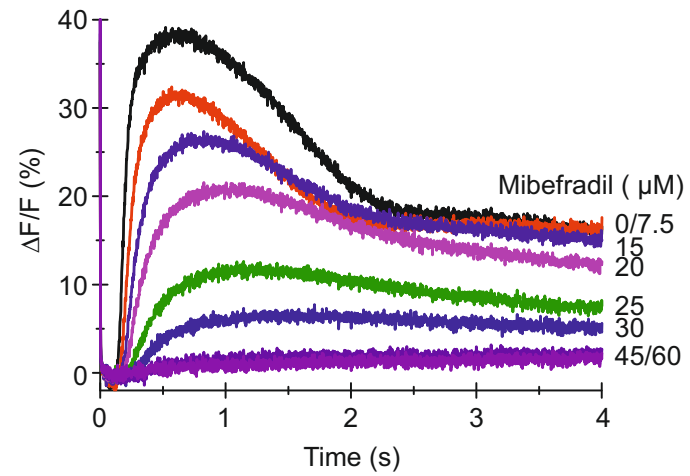

Supplement: embj0034-0379-sd4.pdf [file embj0034-0379-sd4.pdf]

## Supplementary Figure 5 of Seifert et al.

**A**

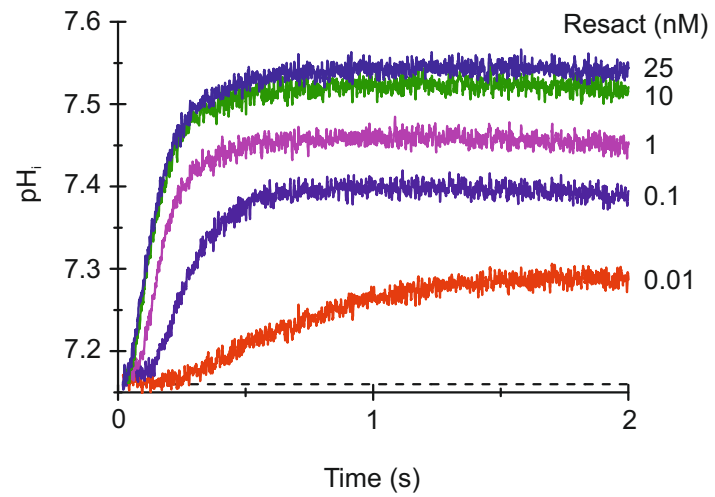

**B**

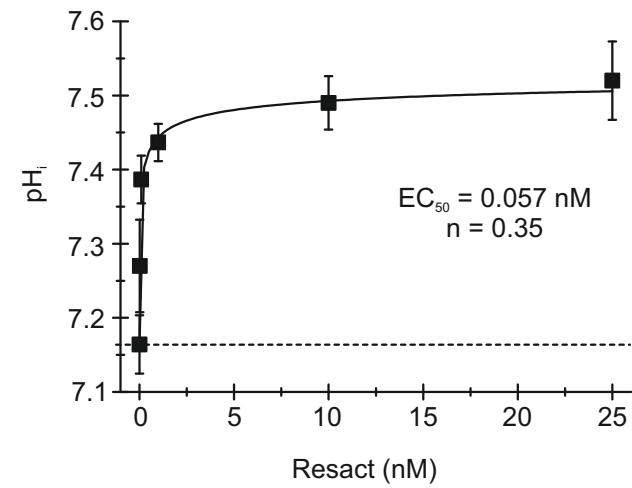

Supplement: embj0034-0379-sd5.pdf [file embj0034-0379-sd5.pdf]

## Supplementary Figure 6 of Seifert et al.

**A**

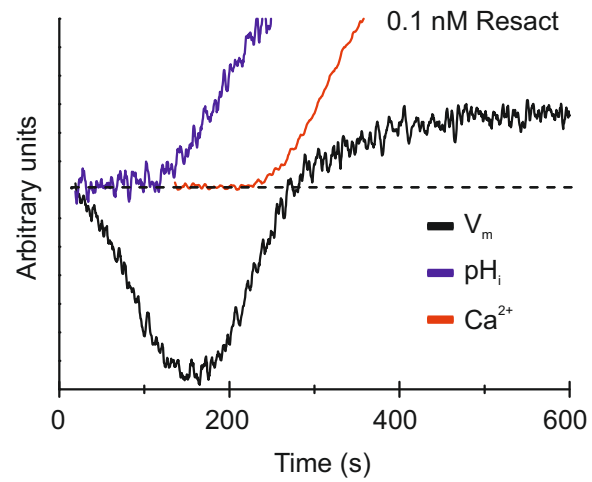

**B**

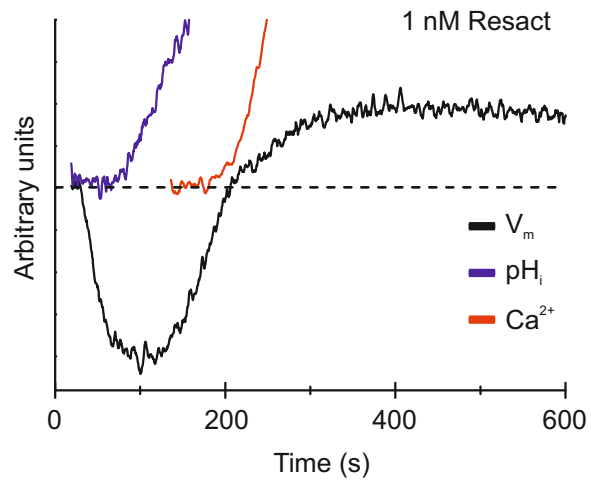

**C**

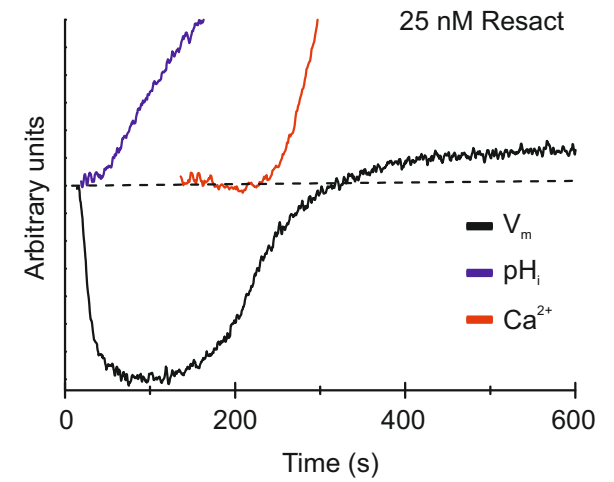

Supplement: embj0034-0379-sd6.pdf [file embj0034-0379-sd6.pdf]

## Supplementary Figure 7 of Seifert et al.

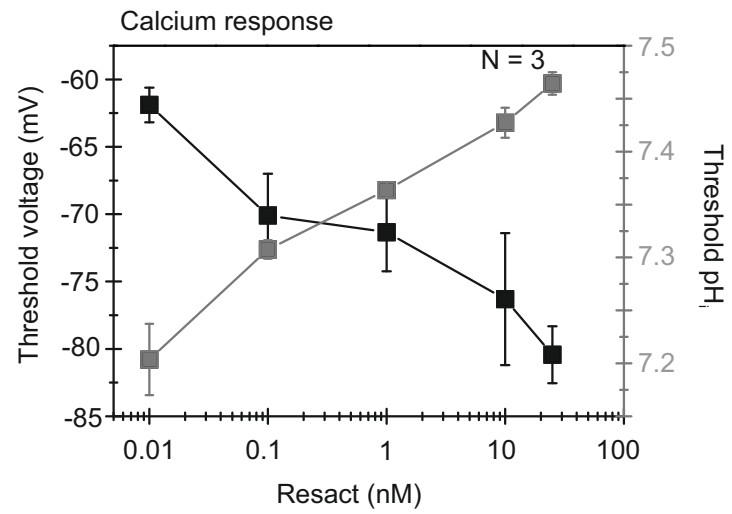

Supplement: embj0034-0379-sd7.pdf [file embj0034-0379-sd7.pdf]

# Supplementary Figure 8 of Seifert et al.

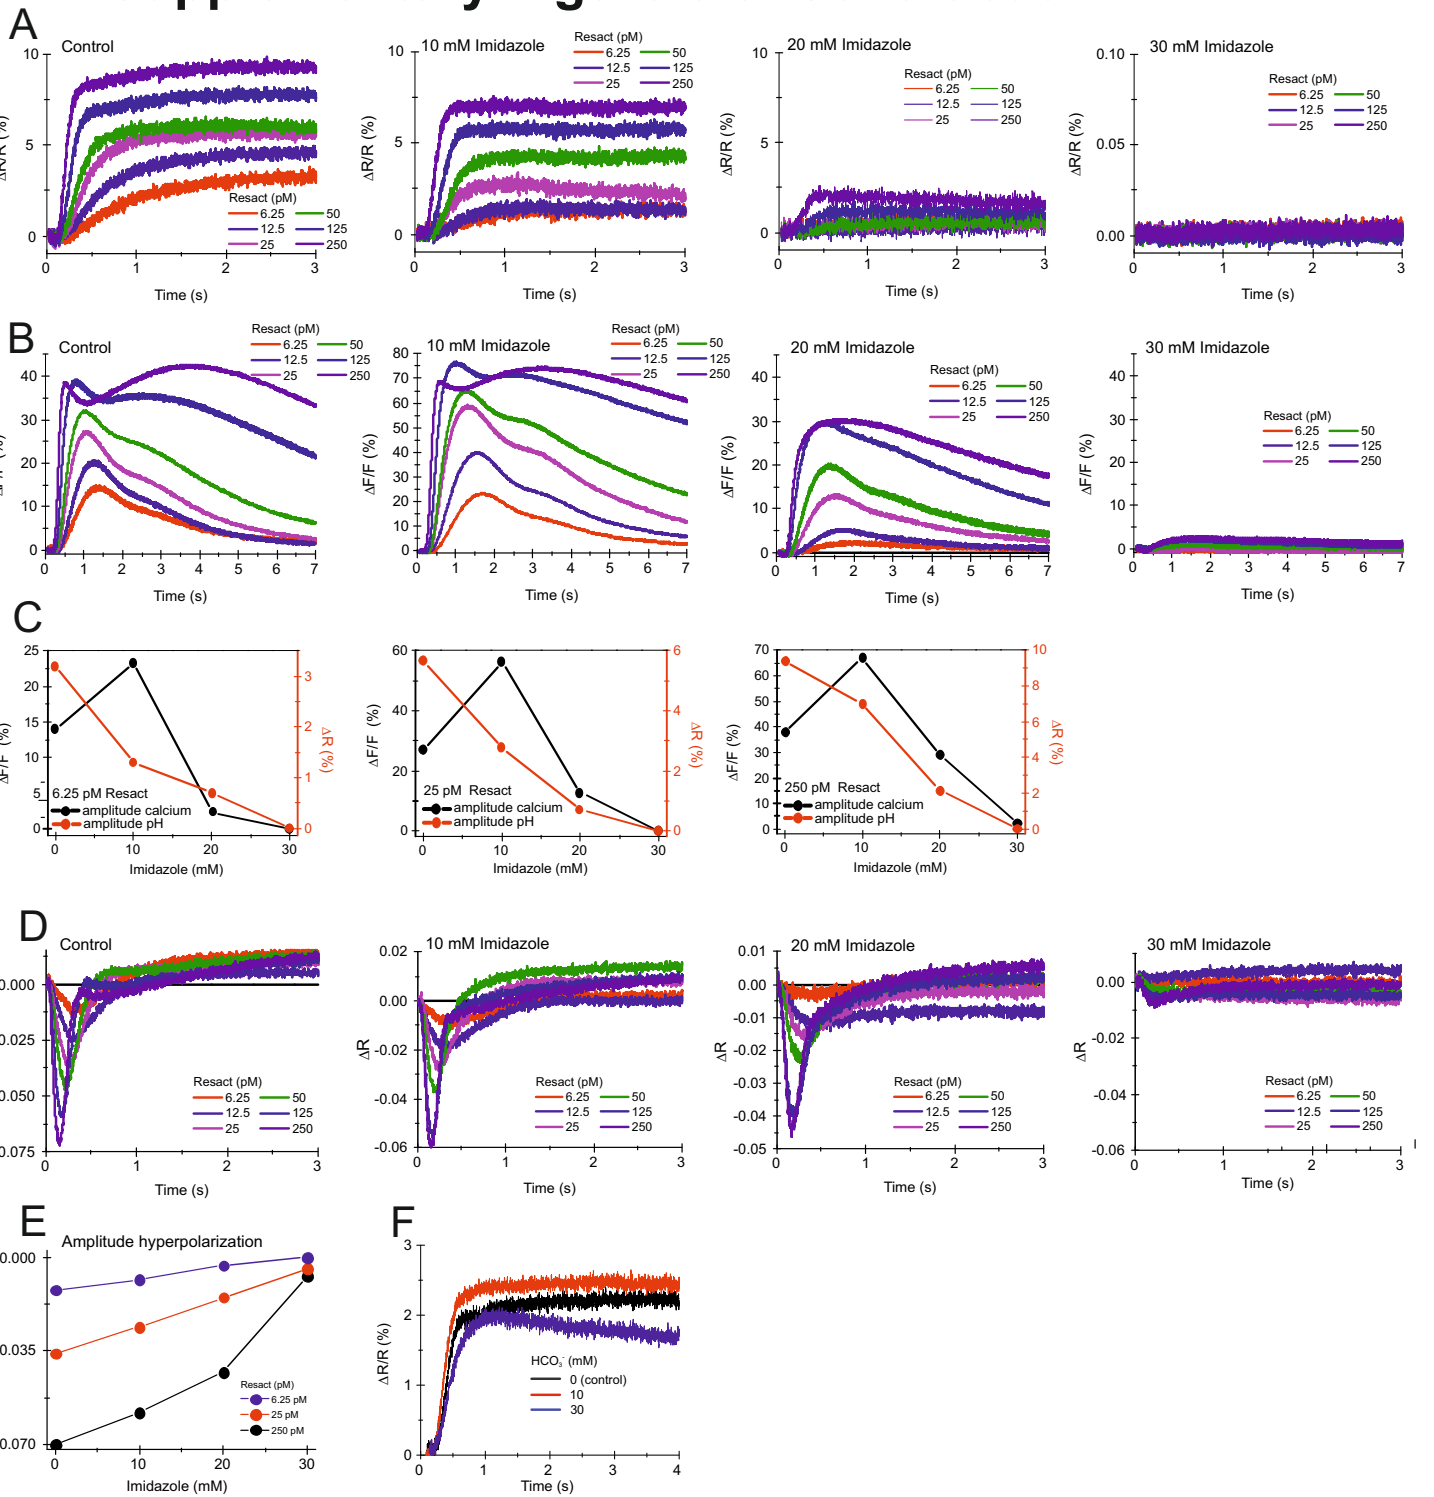

Supplement: embj0034-0379-sd8.pdf [file embj0034-0379-sd8.pdf]

## Supplementary Figure 9 of Seifert et al.

**A**

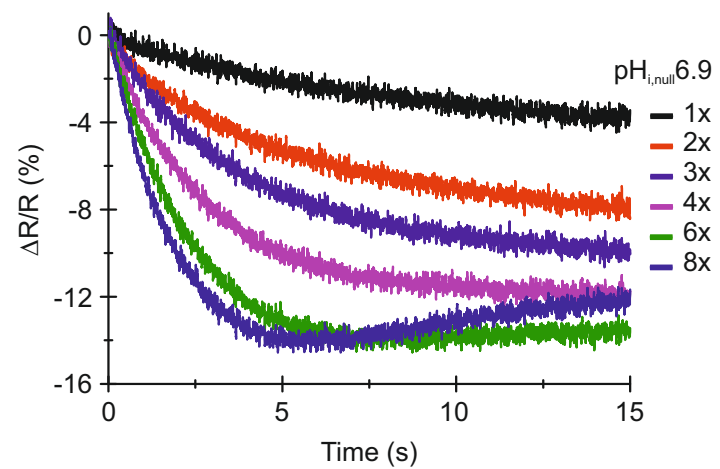

**B**

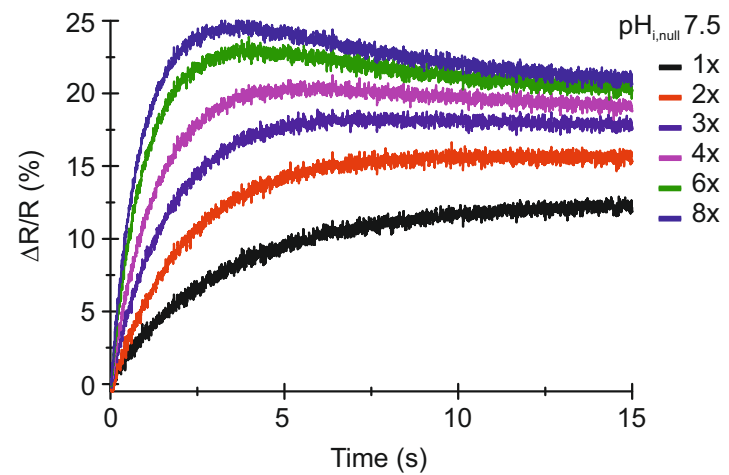

Supplement: embj0034-0379-sd9.pdf [file embj0034-0379-sd9.pdf]
